# Supplementary material for: Detecting the presence of fish farm-derived organic matter at the seafloor using stable isotope analysis of phospholipid fatty acids
Source: Springer Nature journal article supplement (doi:10.1038/s41598-017-05252-w), 2017-07-05
Supplement: MOESM1 [file 41598_2017_5252_MOESM1_ESM.pdf]

# **Detecting the presence of fish farm-derived organic matter at the seafloor using stable isotope analysis of phospholipid fatty acids**

Daniel J. Mayor<sup>1,2,3,\*</sup>, Nia B. Gray<sup>2</sup>, Giannina S. I. Hattich<sup>4</sup>, Barry Thornton<sup>2</sup>

<sup>1</sup> National Oceanography Centre, Southampton, SO14 3ZH, United Kingdom

<sup>2</sup> James Hutton Institute, Aberdeen, AB15 8QH, United Kingdom

<sup>3</sup> Oceanlab, University of Aberdeen, AB41 6AA, United Kingdom

<sup>4</sup> GEOMAR, Helmholtz Centre for Ocean Research Kiel, Wischhofstr. 1-3, 24148 Kiel, Germany

\* Corresponding author. E-mail: [dan.mayor@noc.ac.uk](mailto:dan.mayor@noc.ac.uk)

## **Supporting information**

**Table S1. Model output for Linear Mixed-Effects analysis of bacterial biomass.**

**Fig. S1. Effect of farm size on concentrations of individual sediment phospholipid fatty acids (PLFAs).**

**Fig. S2. Effect of farm size on the relative abundances of individual sediment PLFAs.**

**Fig. S3. Effect of farm size on the carbon isotopic signatures of individual sediment PLFAs.**

**Fig. S4. Effect of distance on concentrations of individual sediment PLFAs.**

**Fig. S5. Effect of distance on the relative abundances of individual sediment PLFAs.**

**Fig. S6. Effect of distance on the carbon isotopic signatures of individual sediment PLFAs.**

Supplementary Table S1. Model output for Linear Mixed-Effects analysis of bacterial biomass. Random effect (a), intra-class correlation (b) and fixed-effects (c), showing coefficients  $\pm$  SE and t-values with p-value in parentheses.

|    |                         |                                                     |                                                    |                                                   |                                                   |              |
|----|-------------------------|-----------------------------------------------------|----------------------------------------------------|---------------------------------------------------|---------------------------------------------------|--------------|
| a) | $\sigma$                |                                                     |                                                    |                                                   |                                                   |              |
|    | Farm ID                 | 6.054593                                            |                                                    |                                                   |                                                   |              |
|    | Residual                | 6.219214                                            |                                                    |                                                   |                                                   |              |
|    |                         |                                                     |                                                    |                                                   |                                                   |              |
| b) | Intra-class correlation | 0.48659                                             |                                                    |                                                   |                                                   |              |
|    |                         |                                                     |                                                    |                                                   |                                                   |              |
| c) |                         | Distance 0 m                                        | Distance 25                                        | Distance 50                                       | Distance 100                                      | Distance 200 |
|    | (Intercept)             | 24.66036 $\pm$ 3.758683<br>6.560905<br>( $<0.001$ ) | -                                                  | -                                                 | -                                                 | -            |
|    | d25                     | -1.9255 $\pm$ 3.305643<br>-0.58249<br>(0.5641)      | -                                                  | -                                                 | -                                                 | -            |
|    | d50                     | -7.94265 $\pm$ 3.440417<br>-2.30863<br>(0.0272)     | -6.017144 $\pm$ 3.052032<br>-1.971521<br>(0.0568)  | -                                                 | -                                                 | -            |
|    | d100                    | -10.4357 $\pm$ 3.265569<br>-3.19568<br>(0.003)      | -8.510214 $\pm$ 2.865840<br>-2.969535<br>(0.0054)  | -2.493069 $\pm$ 2.963226<br>-0.841336<br>(0.4060) | -                                                 | -            |
|    | d200                    | -13.1531 $\pm$ 3.265569<br>-4.02782<br>(0.0003)     | -11.227611 $\pm$ 2.865840<br>-3.917738<br>(0.0004) | -5.210467 $\pm$ 2.963226<br>-1.758376<br>(0.0877) | -2.717398 $\pm$ 2.781317<br>-0.977018<br>(0.3355) | -            |

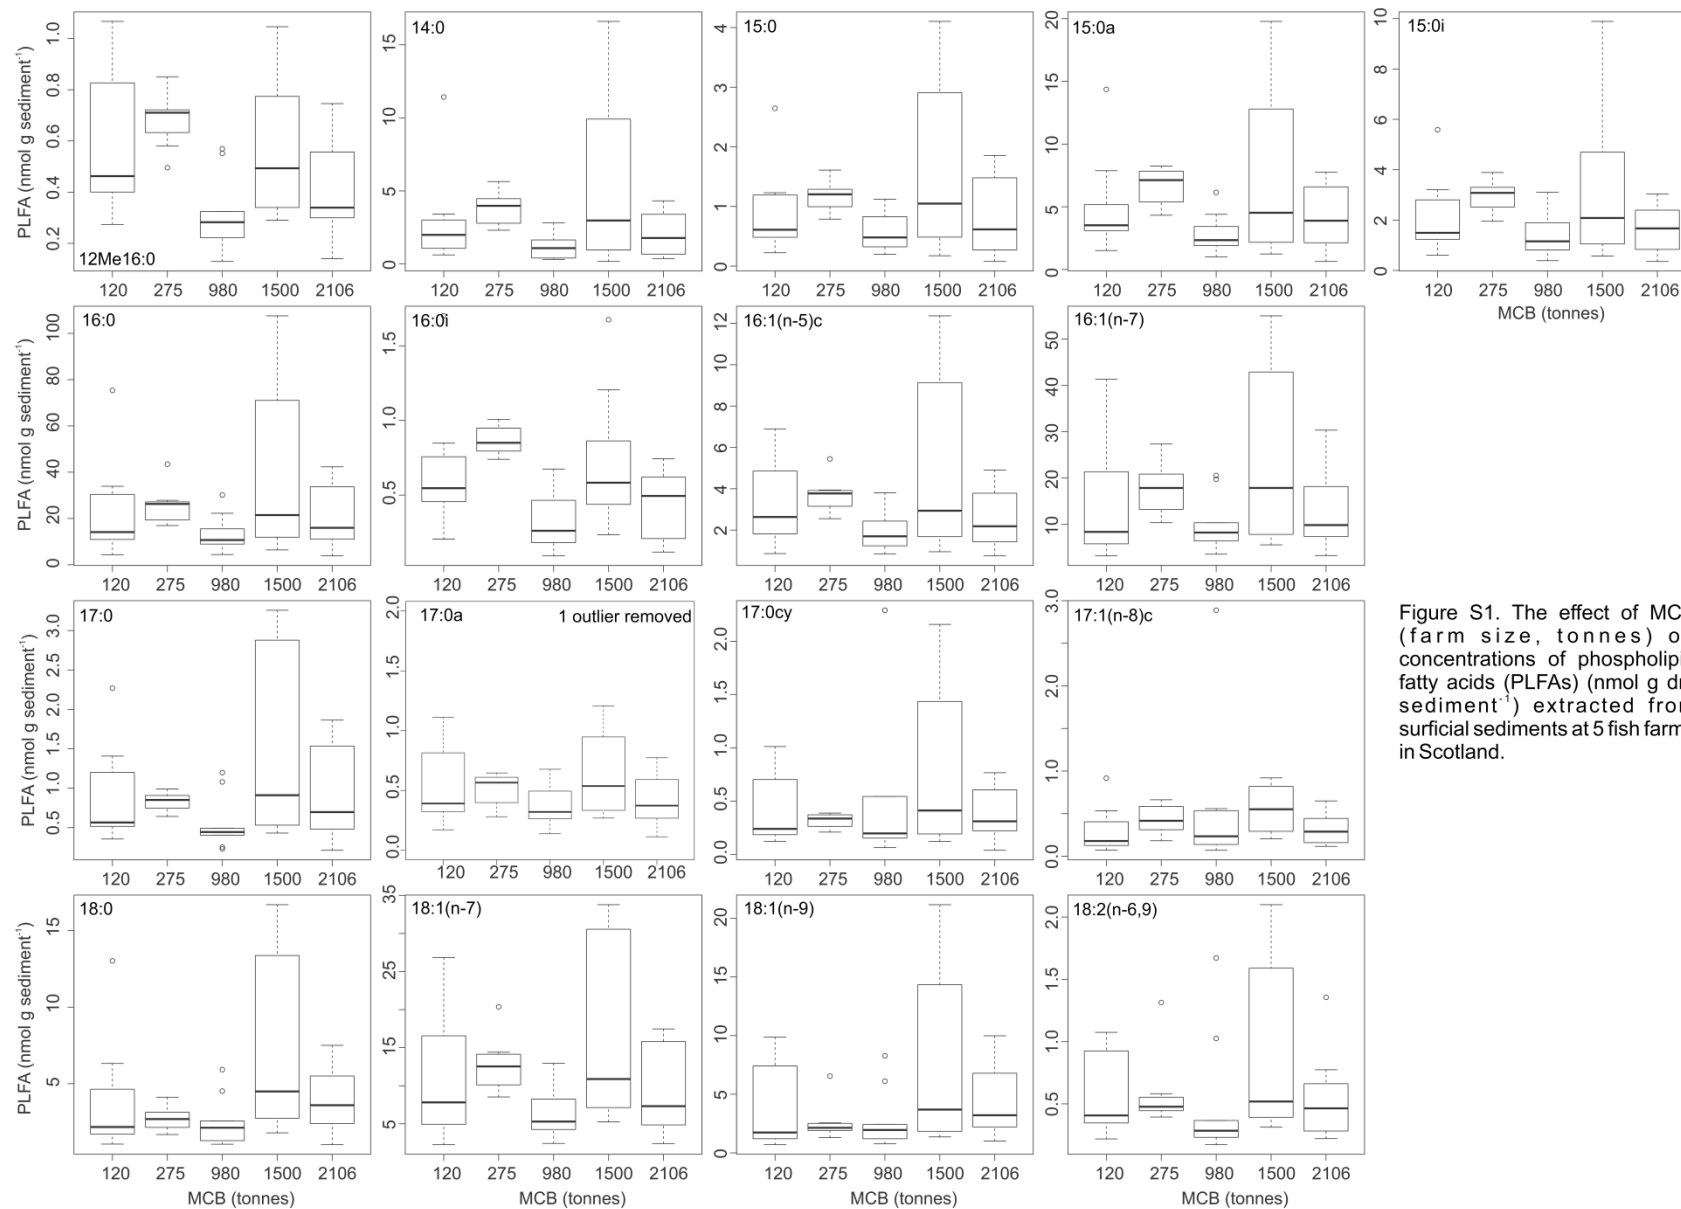

Figure S1. The effect of MCB (farm size, tonnes) on concentrations of phospholipid fatty acids (PLFAs) (nmol g dry sediment<sup>-1</sup>) extracted from surficial sediments at 5 fish farms in Scotland.

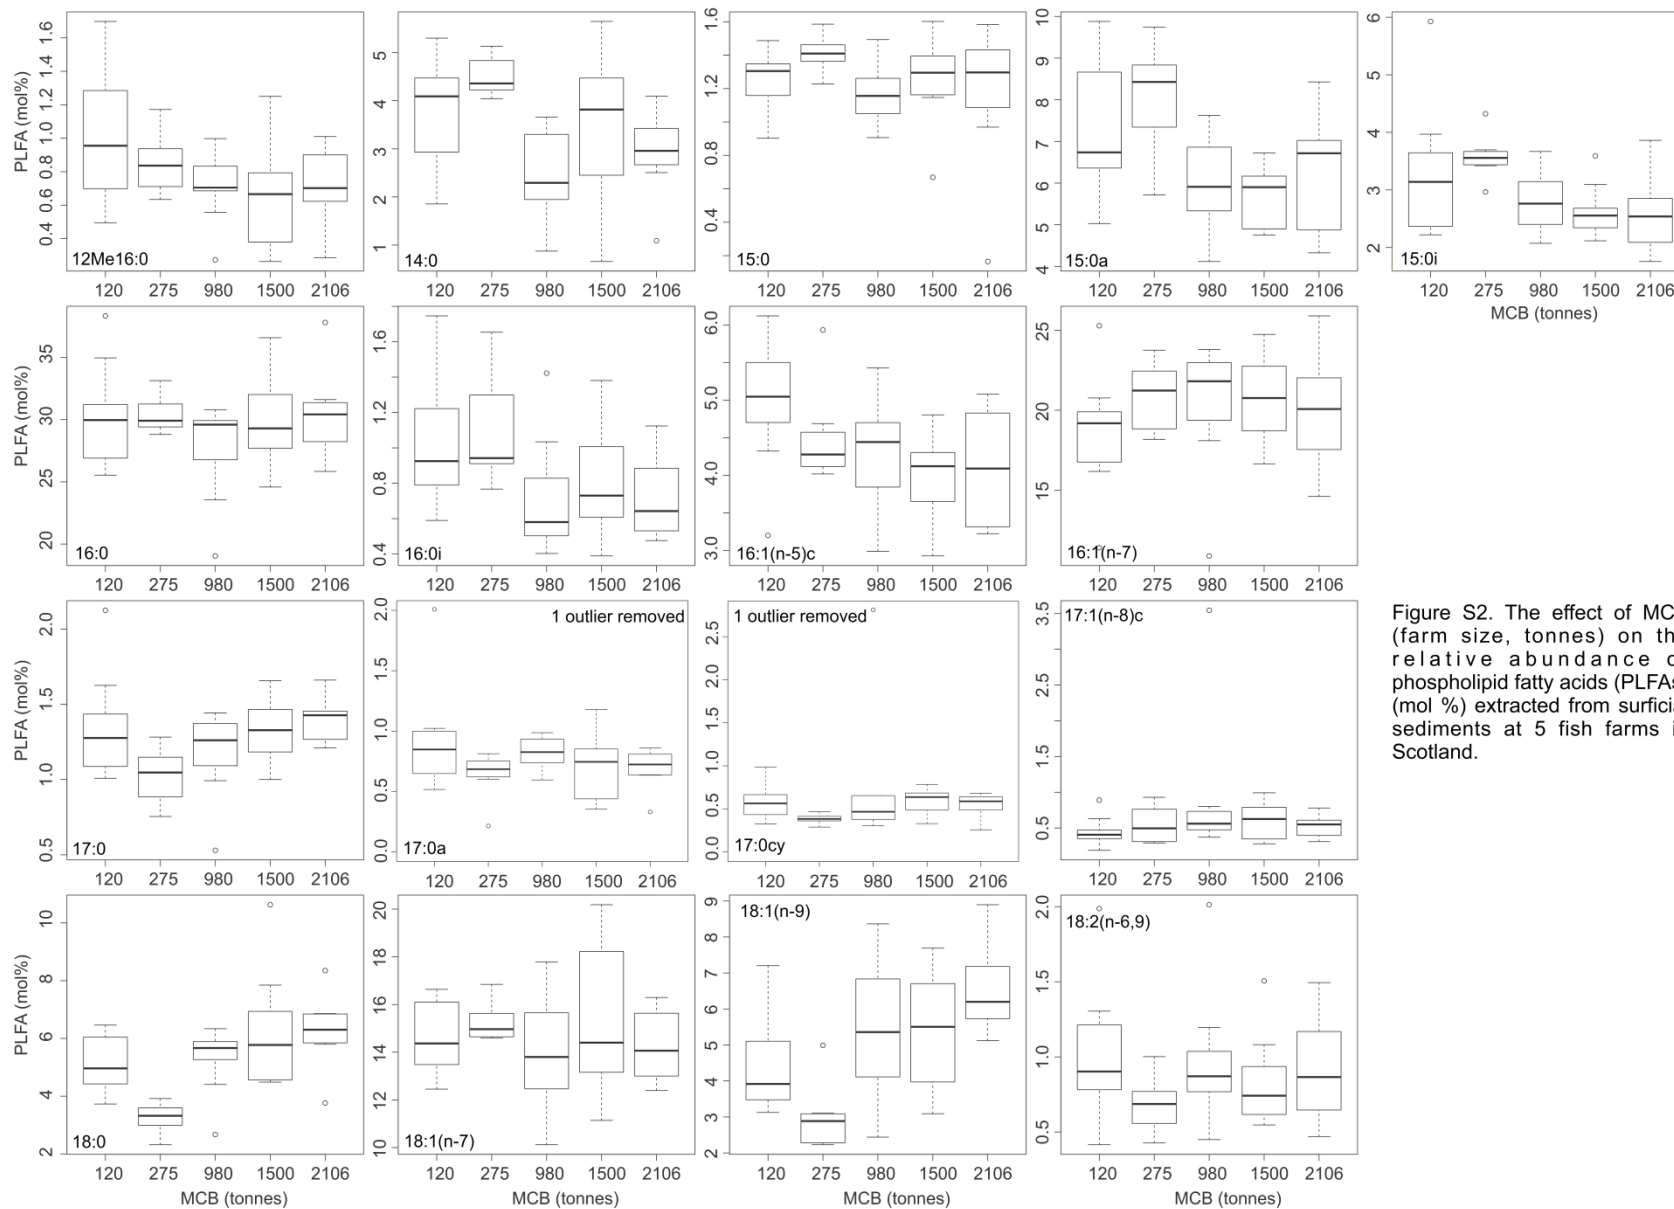

Figure S2. The effect of MCB (farm size, tonnes) on the relative abundance of phospholipid fatty acids (PLFAs) (mol %) extracted from surficial sediments at 5 fish farms in Scotland.

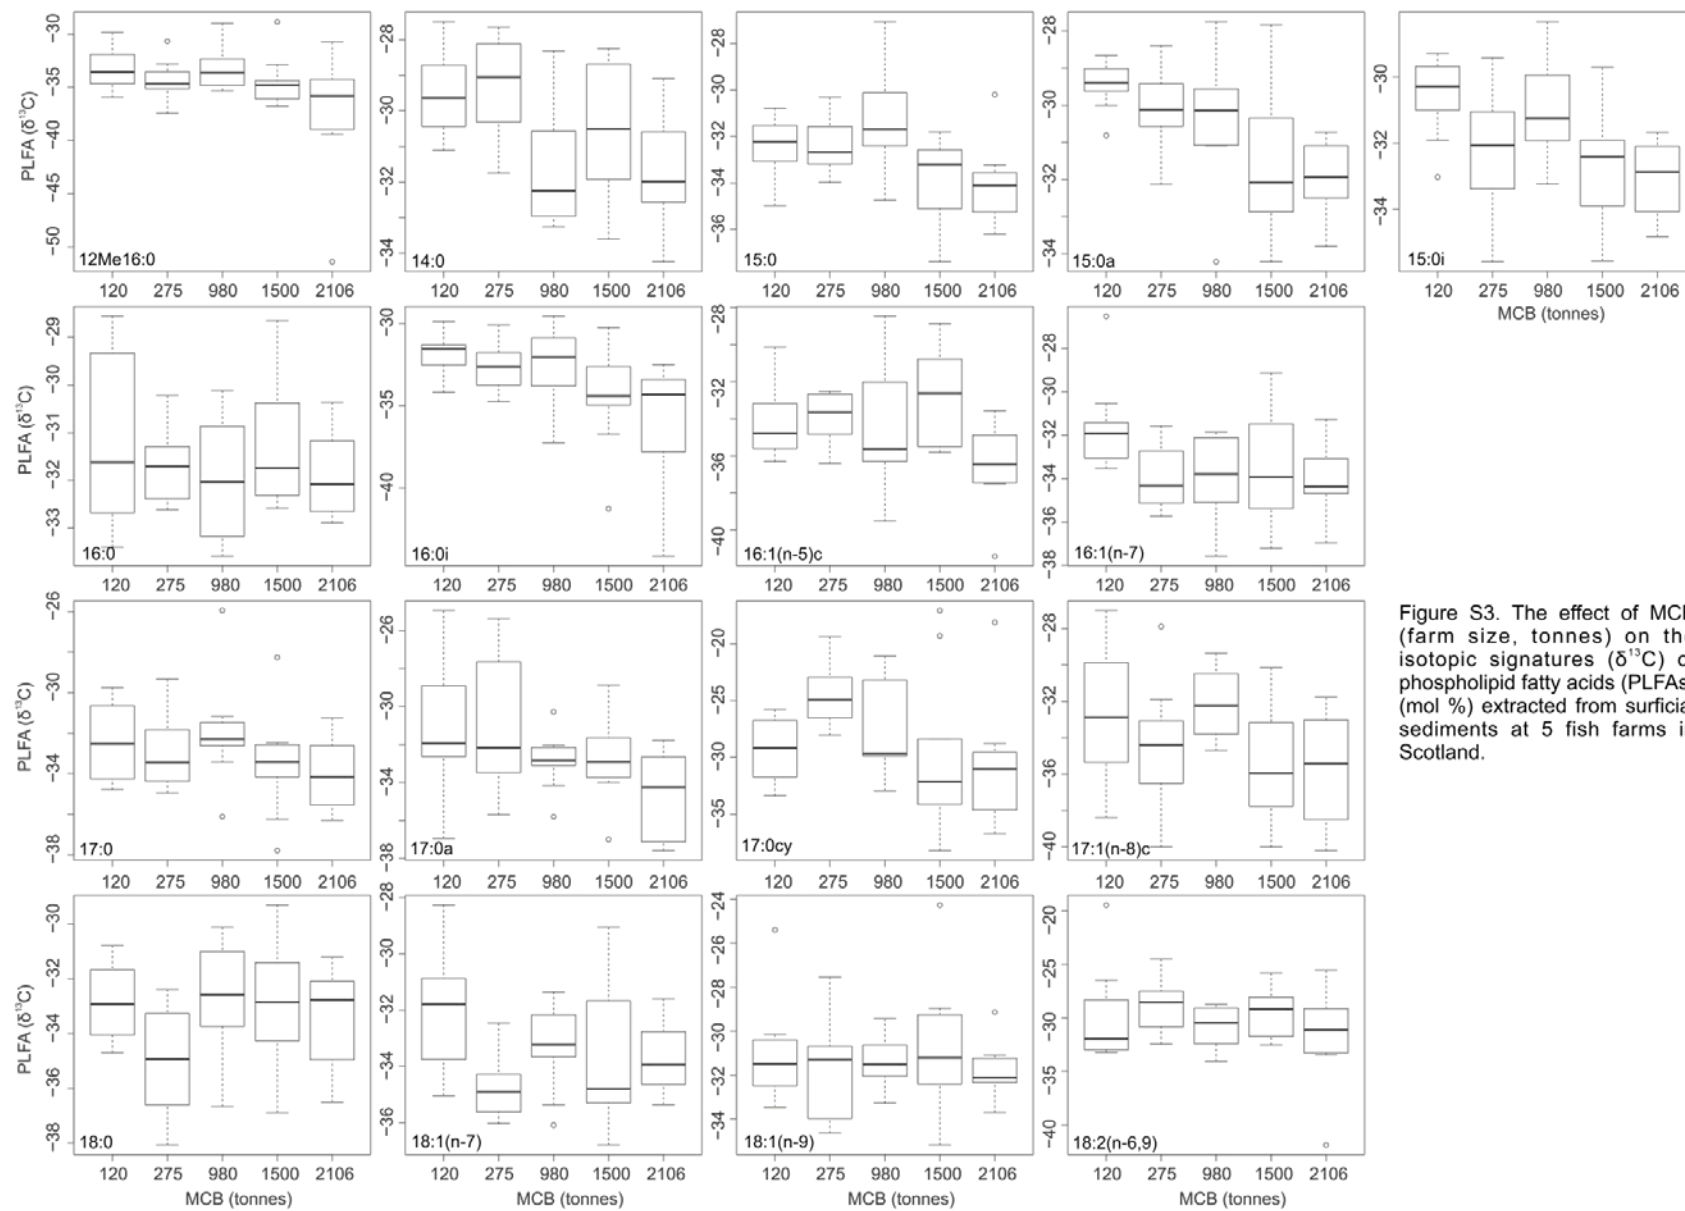

Figure S3. The effect of MCB (farm size, tonnes) on the isotopic signatures ( $\delta^{13}\text{C}$ ) of phospholipid fatty acids (PLFAs) (mol %) extracted from surficial sediments at 5 fish farms in Scotland.

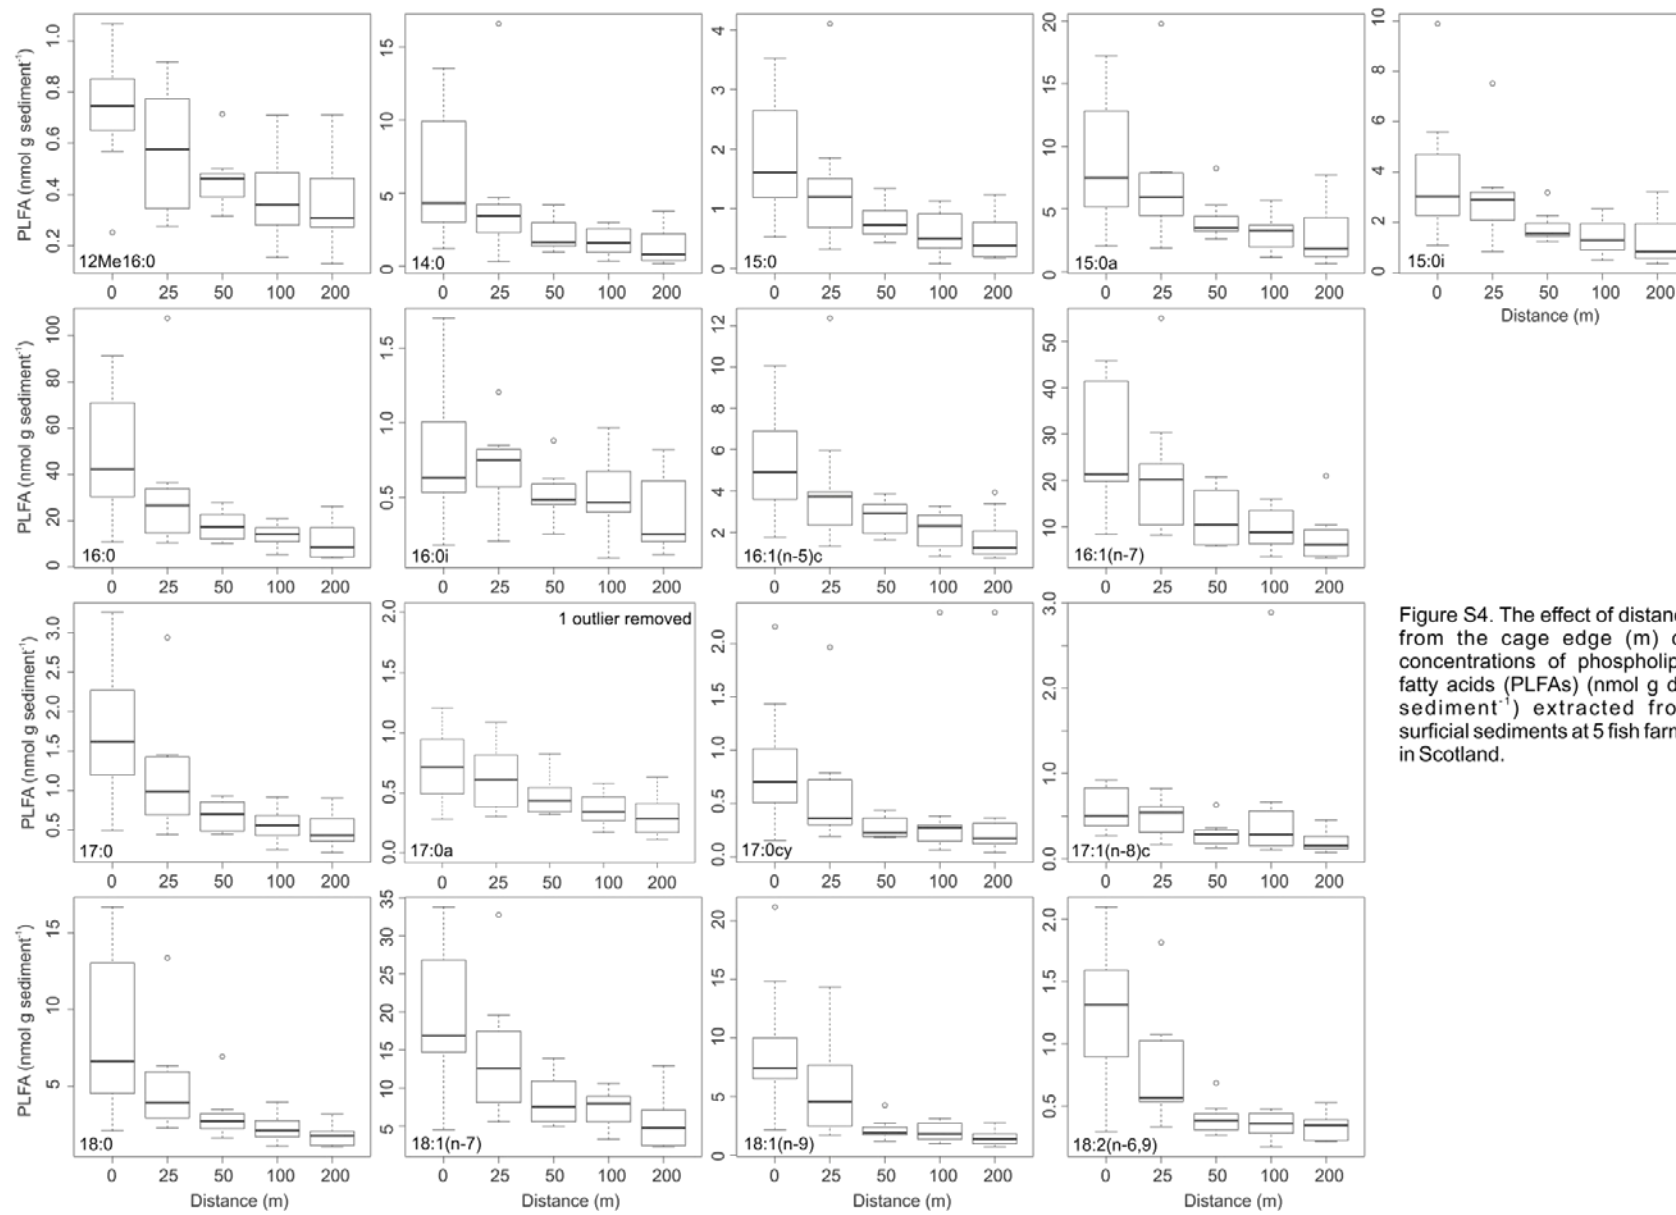

Figure S4. The effect of distance from the cage edge (m) on concentrations of phospholipid fatty acids (PLFAs) (nmol g dry sediment<sup>-1</sup>) extracted from surficial sediments at 5 fish farms in Scotland.

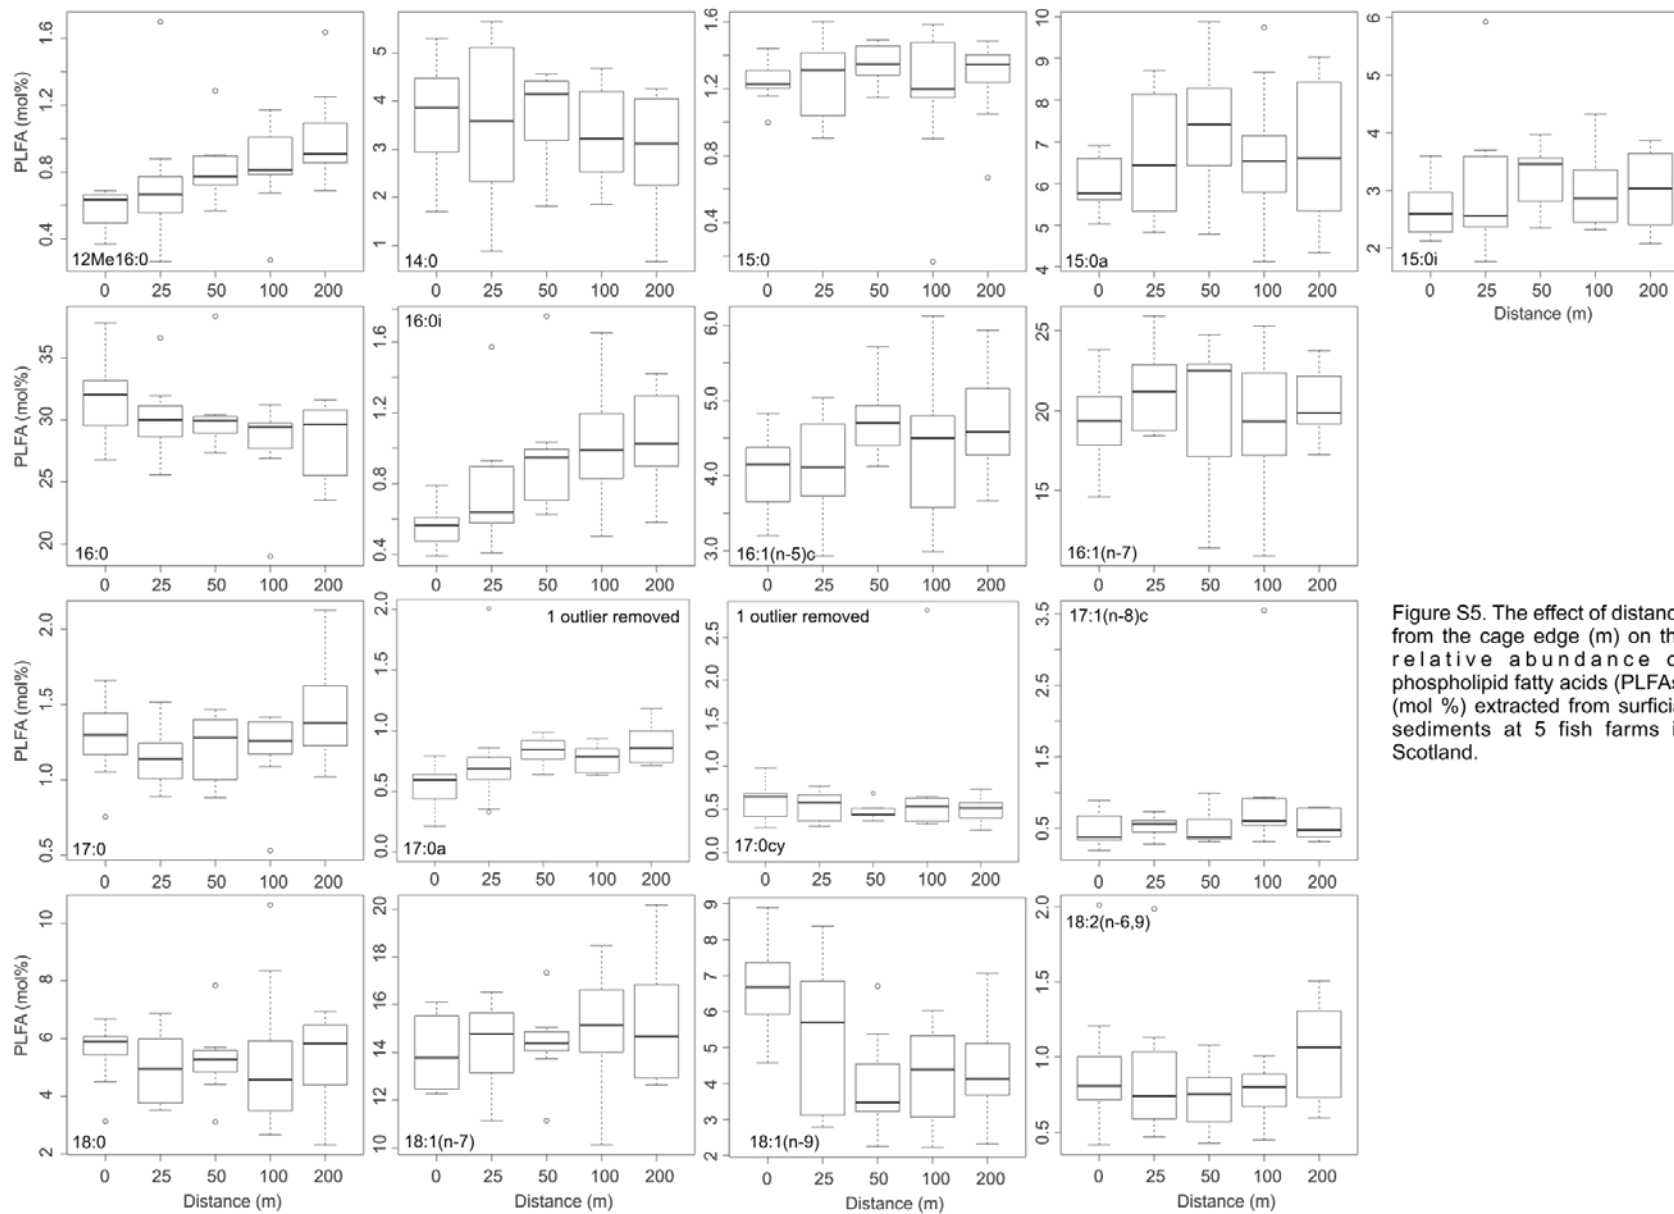

Figure S5. The effect of distance from the cage edge (m) on the relative abundance of phospholipid fatty acids (PLFAs) (mol %) extracted from surficial sediments at 5 fish farms in Scotland.

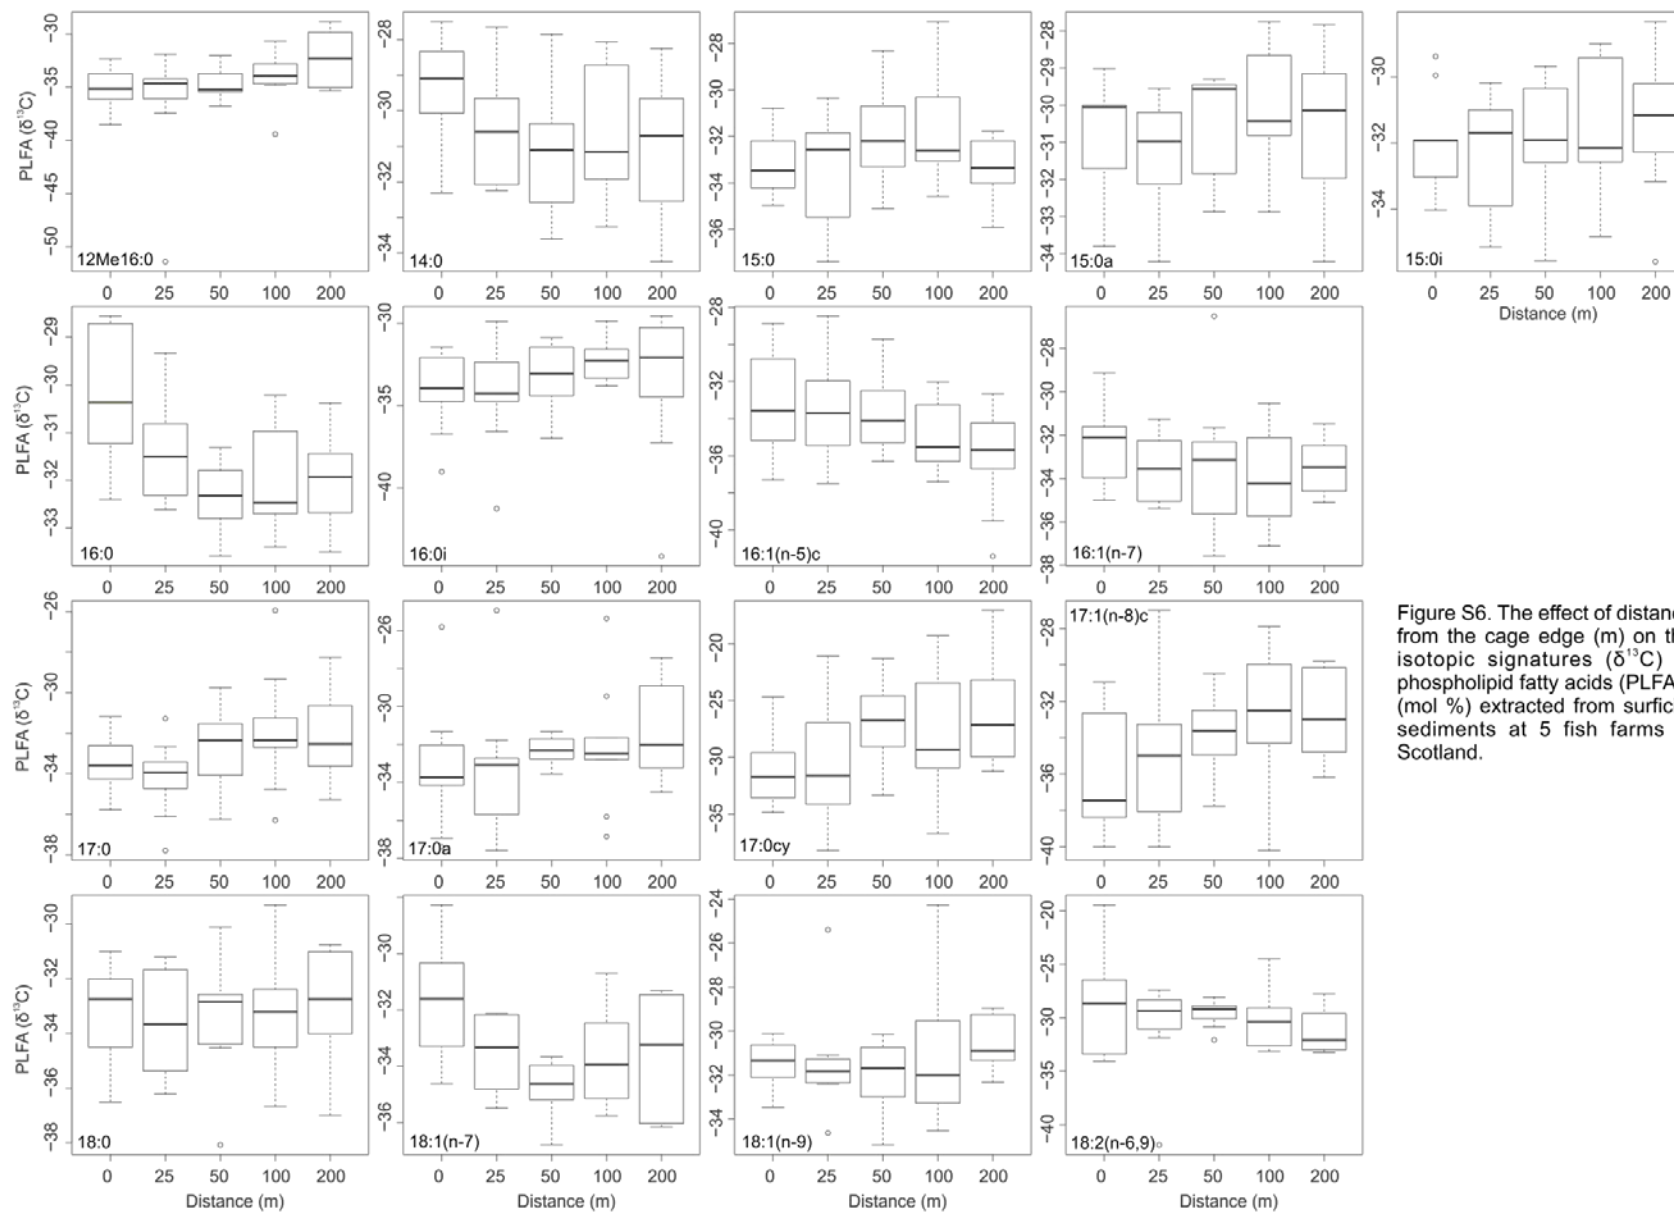

Figure S6. The effect of distance from the cage edge (m) on the isotopic signatures ( $\delta^{13}\text{C}$ ) of phospholipid fatty acids (PLFAs) (mol %) extracted from surficial sediments at 5 fish farms in Scotland.
